# Supplementary material for: MMTF—An efficient file format for the transmission, visualization, and analysis of macromolecular structures
Source: PLoS Comput Biol. 2017 Jun 2;13(6):e1005575. doi: 10.1371/journal.pcbi.1005575 (PMC5473584; doi:10.1371/journal.pcbi.1005575)
Supplement: S1 Table — (XLSX) [file pcbi.1005575.s001.xlsx]

## Sheet: S1_table.csv
PDB ID
1vyz
2n8p
3i4t
1lev
2pj6
1hga
2k9d
3w7p
4l3v
2bvk
2mf7
3vbg
3jv2
3iwl
1w2l
2qr3
4cz7
3ker
4kpx
5a57
2a0c
5ecm
1c54
3v2i
1yxm
2a8h
3drx
1d4z
3t0d
2gln
2pdl
1dll
3q07
3v05
1z55
2cc6
2eld
2bxp
4ezl
2wy8
2b2y
1xz6
2j6s
3p2o
3mgp
4pry
4jg9
363d
4s2e
3bql
4z0c
3fkm
4m7p
4x71
2r7b
2c7n
2g9a
2n8f
3wfd
2boe
4htm
2cui
3qjn
2ofs
1knk
4rp7
5gcn
4wrt
1onz
3txk
5g68
1mow
1j34
4j8e
2ax9
3rys
3oiy
4zir
4yj0
4ym8
4ncq
4mgd
1g08
4r5d
2n4e
4kzc
3gng
4bkl
1sum
2q1q
3lvx
2hbq
2qiy
5ik7
2z42
1itw
1k3z
1uf3
1zll
1out
2rcq
2f3i
4d0v
1uo3
1svm
2z6w
4m4p
4b5n
3wz3
3ha0
4ww3
3gt4
5ei2
1jjv
3r99
1a9l
4bjy
4fiu
1viw
3ntt
4iw8
1onw
5jhv
5e7l
4p8s
2mz6
1xb9
3luq
5hzf
2yas
2j1e
1bsu
1s6x
3f2f
4dxz
2lsk
2hwi
2v9z
2kh8
4gnl
4qzc
1ygb
1gb5
1k9x
2m8m
4ygw
3iwr
5ami
4c5k
2eio
1f0o
4e5h
4zan
4fdl
2wml
3b71
4g81
4qdj
3lth
1gpf
1cct
2wcq
5lff
3ddq
2z33
3rzw
3iym
1gt3
2ivn
4ptj
5bxr
3k3c
3r5o
3gd7
4lh1
5b8d
4o8h
5d4l
1ghw
1c6v
2mjw
5hjc
1m49
4j53
1x6n
5jf5
1yvi
3cip
2oc6
3t4h
3ey5
1dch
4hq8
3m4y
2ggz
3ru9
2q4n
2d32
4oqx
3nky
4z03
5k6c
1jlc
4krc
2m9e
3spa
7rat
4agh
2xqv
5j0q
5flt
5hwu
3miu
5ek0
3m4z
3rwe
5c3f
3skk
1jb3
3lo4
3qva
3g2b
3lmk
3lpn
3mgl
1p7y
1t62
1c51
1g27
1cw4
1le9
4bxv
1rbr
1e0v
4dw1
1wg4
3s7s
3nwx
1u7u
1apa
5iya
2epe
5kr8
1qk6
2e1d
3fc2
2f7o
2j7g
2wzi
1zyg
3qg7
4ynr
3mxj
3pdb
1x1t
1zut
3mwa
4r4k
2fsr
3ufd
2qq9
4k02
3v7i
1ceb
2lw6
4ql5
4xj2
2dxc
5d47
3qy0
3l61
1smp
1q59
4ddj
4rz5
2q0s
5ehr
3puf
5dkw
4jwu
1efe
1iaa
1u9b
1zgq
3g35
1rbu
1yy1
2ogi
1ofz
4jsy
3kxh
3t5g
2f6b
1et8
2z4h
3ul8
3e9z
1xtf
3evy
4ld6
4x88
2l02
2h2a
2fvf
1svo
3ltn
4bab
4wuh
3k3w
4awu
3sds
5coe
4yuy
1xeb
3qi8
3qqt
1r5p
4tzb
5jkd
3g60
5ah1
2jge
1yei
4ucr
2oq6
1op3
3v9i
1j4v
4yt5
1l79
2h8w
4wsi
4rr5
9xia
4jf1
1emr
1egp
1e8o
1o34
4jdq
1k68
4e7w
3dxn
3ba8
2kv6
1q4w
2r3d
4xz8
2oox
2fr0
3ts0
3swz
3pwz
3h05
1yl7
2y0l
2f8n
2nw0
4hhr
3mnz
1n1u
2z2p
1x11
3o2y
5dvx
3bcy
2jog
2b7m
1n6i
1vhv
2nrr
1crf
3f53
2db1
4l2y
3h1g
1r9v
5jhi
1f1t
2wow
1zqc
3pgc
1zwf
5d79
5awn
1wr3
2k0f
5j63
3jbw
4o1u
1whe
4thi
1hov
1dkn
4qa5
3n4g
2b75
9pai
5cel
4ohz
3000000000000
3c8s
1c91
1cof
2q3i
3izy
4ade
2mqm
1msm
1qgv
4ldr
1s48
1y2h
3lr4
2p9i
2gp8
3wt4
3erh
5g6b
2acx
1kfj
378d
2okx
4d9j
1iwv
2zdc
3upy
2w2s
2p5f
1cfy
1b45
3svz
4bnr
4x1w
3w36
2qeq
4g7g
3cjx
3nq8
3d4t
1bqy
3vmo
3la8
3cpl
4no8
1fp3
4g3m
3wtj
3wyh
1lpj
3t06
4rqb
5i3r
4v3w
5k1a
1xy8
2brj
4oaz
5gs3
2rpe
3e9h
3zzp
13gs
1hxw
3eml
2f7s
2b3a
2f0q
1lm7
1rtr
2vrj
1y4w
2va5
1ieo
4p42
1n7g
3u0y
1yfh
3o02
4rsv
2fyr
2ard
3klm
4elv
2v36
1vvc
3qeo
1h45
3mvt
1ciu
2wqp
5fb0
1d5t
1qvn
1uln
1gu7
1e1a
2piq
5aj3
5a3i
4bkn
3dc0
2coj
3mmd
4x7o
5ekj
4oky
2jbg
1mo3
3ond
5fsp
5ery
1sm4
1sl5
2fcg
4mm8
4rhm
3wql
4a3n
1thz
3p16
5lwm
3fuv
3bz5
4de7
2qym
3gw8
1pyc
5cyn
1gzq
1fgh
1o0d
5abn
4klt
4tlp
2b10
1o1v
3riy
3n1i
3jv9
3aoa
5a2c
4p7l
4ovl
4pqw
2j47
4f7t
4u23
3sdk
1otd
3akr
3zpe
5jao
4xnv
3g6q
1vcp
1sgj
2rsl
3vu8
1a58
4fh0
1svj
1jmw
5jnn
5aqv
5a78
4x9l
3czv
4ds7
3sd4
4grx
1d1o
4yud
1dru
1i42
4aza
1hph
1joo
4c6p
4do9
3v1p
5hv2
5fv1
4ytq
2w69
1hhk
3lwe
3hx1
2y4y
3uqr
2clx
2h4i
2c3c
1yrb
3pcx
4h7o
3en3
1dzw
3tkd
3kqp
5esw
1bx0
1d01
1v4k
2eao
3q09
1zyi
2wrd
3nt0
1p8t
3pen
5ed4
3gdn
1ltw
2vgc
1hcx
1qkr
2bi6
4b7h
4ma8
4cry
2jzd
5trj
4b9w
3nnd
1xh8
5pep
1qox
3w8n
3sba
4twf
4h3w
3r4m
1me0
4ial
4uab
4bvp
2p2o
3m0o
2hsl
1w7f
5der
4oz5
2bfq
1zqr
4o2z
3mdc
4cpu
5p79
1hrn
4hzm
1d8w
2o8t
1oh9
2i26
2atv
1ljz
4w1s
1z91
1m7k
3zi1
2x4w
4up2
4bai
4lub
1xem
1iyu
4eta
3p2s
5gxb
4z4l
4ibv
2jvb
4imj
5fdl
8prk
1qp1
3i2i
3qi1
1gum
1vc4
3fyr
4u81
2x1w
1gsl
4edi
1s00
3njr
3d2y
3iuy
2q67
1zk4
2cxy
2vk4
1k04
3t9z
5f46
4mfk
3dbu
2a13
3shp
4fma
4iza
4rvz
1s3t
4j0h
1d6o
1e+42
4n10
219d
2l53
1x12
4acx
2i2b
4xyw
3zzy
3rx2
4w7s
2pxp
4bsg
1fv1
4lzg
3arb
2mp3
4kht
3irr
1do4
4ylk
1k5f
2kjm
5e6m
1hde
4ryt
3fhy
224d
4uag
2nuv
2no4
1kum
2wth
3dxh
4r1a
4own
1j71
3rdb
3f5r
4h69
3v81
5i18
4aea
3hd8
2oho
1vm6
5knw
2ghe
1cr0
2x2b
3uma
4axf
4yfy
2dr1
4d5p
1y47
1tiv
4c0s
1kra
1u56
3vui
1eg1
2hdr
4j8v
3me9
1cpr
5hma
2nqc
1wox
3hj4
2axl
1bmz
4uzc
1u0v
3ma8
2k2m
2kvv
5e9r
2ddc
1bxm
2m80
4dwf
4cxh
2z62
4ecz
4mcd
2o8h
4g3n
3ehy
3q8v
2crm
2n2m
2vk0
1ndm
5ikt
2trs
2d16
1dj5
3fzt
1o6f
4o1a
3of9
1wp4
2k7p
3o2m
1gsq
5abk
1t60
1vqa
3gac
1tia
4bbx
2yyu
4aax
3eo5
4u1f
4hrs
2gvs
2b22
1gv9
3iqq
1aws
5fwx
1tjm
3vs3
2pfi
1jy4
3wtx
3qmq
4gyq
3uqo
2j0u
3ioz
5a68
3eel
2dji
4iub
3iq0
3lcj
4wwr
3dvw
2nwa
4blu
1n8w
1t3m
4amj
1trw
2nw9
3rxz
2q9j
3f4h
5l4m
3if6
4z9g
1bnv
2gel
1mo5
1ug8
2ys9
5iej
1vbx
1yxy
1te2
3qno
4xox
5dnl
4ygm
2e8f
1hja
3jd3
1tsh
1rt5
3ri9
3bvg
1hvg
4oty
2hrz
2h30
4bkd
5hsb
1mio
3kko
1o2q
3ls2
2zrk
2lsi
3fjf
1dfq
4mxe
4hn0
2vek
4nws
1yxe
4dkj
1j5c
4wc4
4jrc
2mk2
4g8x
3u9n
1f1a
5esr
3g9e
3sms
1t33
3hwf
4ng3
4zfx
3ld4
2qij
1tf2
2fi4
4bv1
4g1q
2gz2
1iq3
4bf5
1mcy
1cge
3dq0
1wry
1ac6
5giw
1smm
4w90
3lxt
3a31
3kkg
2e5e
4l1e
1ybf
2r4h
3hwi
2j6x
3u9z
1ngc
4xcs
4eql
2h68
4oyn
1z3k
3n2q
5syq
1tn6
2n2y
3u7j
5by0
4na2
3s13
4cr5
3t40
1my7
4dkn
1zsn
3sqj
4loo
5a7q
1u38
3sdn
2lww
4los
3cnt
1bfd
1tip
4gn7
4jd4
1nm2
3so7
1p96
2jhl
3ma9
4zv8
4phx
2luu
1vqd
3r07
1vag
1xl7
4xf2
4jyw
2yo1
3sjr
5dql
5tgf
2n35
1vic
4qz1
4xp6
4i8y
4wd7
2yrg
3w90
4wop
